# Supplementary material for: Modelling the site of bromide binding in vanadate-dependent bromoperoxidases
Source: Royal Society of Chemistry journal article supplement (doi:10.1039/c2dt12287a), 2012-01-01
Supplement: c2dt12287a.pdf [file c2dt12287a.pdf]

## Supporting online material for

# Modelling the Site of Bromide Binding in Vanadate-Dependent Bromoperoxidases†

Verena Kraehmer and Dieter Rehder\*

\* To whom correspondence should be addressed: rehder@chemie.uni-hamburg.de

## Computational results

### Table S1

Total energy in [H] and cartesian coordinates of the optimized geometry (DFT/ B3LYP) for  $[\text{V}^{\text{V}}\text{O}(\text{Amp-sal})\text{OMe}(\text{MeOH})]$  (**1**) in [Å] (xmol xyz format).  
Basis set: 6-311++g(d,p) for all atoms.  
Energy = -1840.7850408

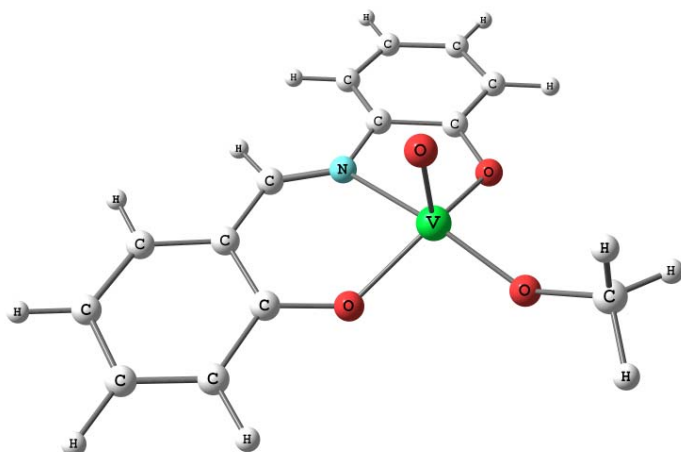

|   |              |              |              |
|---|--------------|--------------|--------------|
| C | 0.005459000  | -0.030417000 | -0.022124000 |
| C | 0.012563000  | -0.047759000 | 1.376767000  |
| C | 1.233369000  | -0.071574000 | 2.079414000  |
| C | 2.445078000  | -0.057771000 | 1.379595000  |
| C | 2.424547000  | -0.032022000 | -0.009276000 |
| C | 1.211983000  | -0.017682000 | -0.711206000 |
| N | -1.084623000 | -0.065432000 | 2.254480000  |
| C | -2.316178000 | -0.138782000 | 1.861293000  |
| C | -3.442712000 | -0.256939000 | 2.742767000  |
| C | -4.749834000 | -0.225353000 | 2.211165000  |
| C | -5.855517000 | -0.391350000 | 3.022230000  |
| C | -5.671155000 | -0.612548000 | 4.396139000  |
| C | -4.400872000 | -0.659265000 | 4.946558000  |
| C | -3.268260000 | -0.475651000 | 4.134905000  |
| O | 1.171007000  | -0.139651000 | 3.409889000  |

|   |              |              |              |
|---|--------------|--------------|--------------|
| O | -2.063598000 | -0.552264000 | 4.679918000  |
| V | -0.414134000 | 0.246455000  | 4.353111000  |
| O | 0.318336000  | -0.096760000 | 5.914912000  |
| C | 0.900732000  | 0.645732000  | 6.962196000  |
| H | -0.926180000 | -0.014001000 | -0.575711000 |
| H | 3.374189000  | -0.074329000 | 1.935650000  |
| H | 3.360485000  | -0.023015000 | -0.556439000 |
| H | 1.212520000  | 0.008072000  | -1.794237000 |
| H | -2.541835000 | -0.135652000 | 0.793622000  |
| H | -4.874682000 | -0.064234000 | 1.145054000  |
| H | -6.853583000 | -0.356235000 | 2.603343000  |
| H | -4.248132000 | -0.836177000 | 6.003982000  |
| H | 0.551949000  | 0.242240000  | 7.917765000  |
| H | -6.533785000 | -0.750477000 | 5.038688000  |
| H | 0.628861000  | 1.704042000  | 6.887715000  |
| H | 1.989997000  | 0.545215000  | 6.912792000  |
| O | -0.630432000 | 1.802442000  | 4.299039000  |

### Table S2

Total energy in [H] and cartesian coordinates of the optimized geometry (DFT/ B3LYP) for [VO(Ser-van)(H<sub>2</sub>O)] (2) in [Å] (xmol xyz format).

Basis set: Basis set: 6-311++g(d,p) for all atoms.

Energy = -1852.8040884

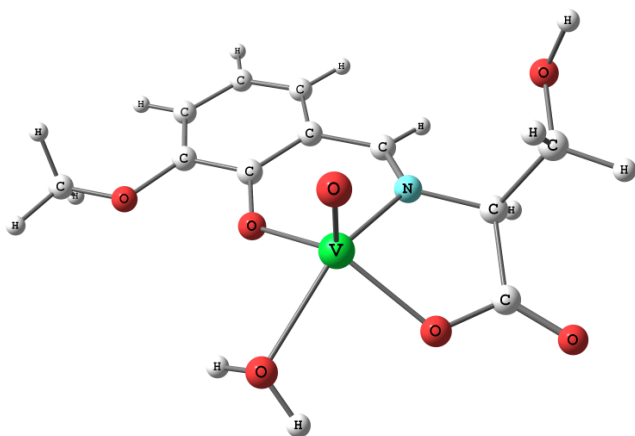

|   |              |              |              |
|---|--------------|--------------|--------------|
| N | -0.375673000 | -0.045796000 | -0.070541000 |
| V | 0.542578000  | 0.159108000  | 1.740678000  |
| O | 2.069854000  | 0.409218000  | 1.420831000  |
| O | -0.492151000 | 1.765918000  | 1.974609000  |
| O | 0.259587000  | 0.034877000  | 3.833562000  |
| C | -1.002905000 | 0.872378000  | -0.729479000 |
| C | -0.986485000 | 2.590259000  | 1.077735000  |
| C | -1.233089000 | 2.217504000  | -0.270598000 |
| C | -1.801529000 | 3.146440000  | -1.175500000 |
| C | -2.103091000 | 4.424001000  | -0.765889000 |
| C | -1.873129000 | 4.805114000  | 0.569120000  |
| C | -1.338235000 | 3.912167000  | 1.484897000  |

|   |              |              |              |
|---|--------------|--------------|--------------|
| C | -0.317832000 | -1.426686000 | -0.559097000 |
| C | -0.233063000 | -2.359464000 | 0.675495000  |
| O | 0.052915000  | -1.726836000 | 1.796298000  |
| O | -0.409982000 | -3.550314000 | 0.564783000  |
| H | -1.421784000 | 0.611342000  | -1.702198000 |
| H | -1.987185000 | 2.835935000  | -2.197738000 |
| H | -2.125467000 | 5.811228000  | 0.877243000  |
| H | -1.223145000 | -1.678703000 | -1.119602000 |
| C | 0.885836000  | -1.653210000 | -1.477133000 |
| H | 0.946894000  | -2.724066000 | -1.694763000 |
| H | 1.802948000  | -1.330770000 | -0.972612000 |
| O | 0.661342000  | -0.895770000 | -2.667689000 |
| H | 1.493458000  | -0.800287000 | -3.139944000 |
| H | -2.525477000 | 5.140845000  | -1.459084000 |
| O | -1.104057000 | 4.186887000  | 2.796968000  |
| C | -1.398644000 | 5.492737000  | 3.273491000  |
| H | -2.464526000 | 5.725674000  | 3.172166000  |
| H | -1.128580000 | 5.491501000  | 4.328186000  |
| H | -0.807513000 | 6.251899000  | 2.749795000  |
| H | -0.089984000 | -0.821683000 | 4.113549000  |
| H | -0.321695000 | 0.741159000  | 4.147685000  |

**Table S3**

Total energy in [H] and cartesian coordinates of the optimized geometry (DFT/ B3LYP) for [VO(sal-BrAla)THF] (**4**, equilibrium state) in [Å] (xmol xyz format).

Basis set: Basis set: 6-311++g(d,p) for all atoms.

Energy = -4492.62047886

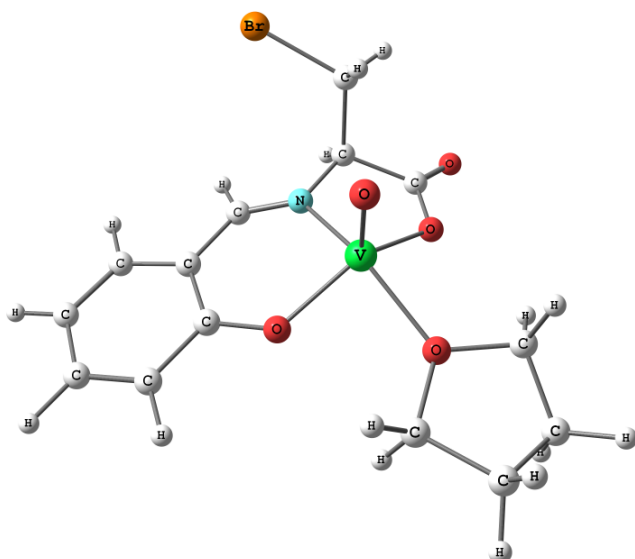

|   |             |              |              |
|---|-------------|--------------|--------------|
| V | 0.000000000 | 0.000000000  | 0.000000000  |
| O | 0.000000000 | 0.000000000  | 1.582243000  |
| O | 2.017585000 | 0.000000000  | -0.528632000 |
| C | 2.860526000 | 1.197294000  | -0.451146000 |
| C | 2.843106000 | -1.201094000 | -0.690488000 |

|    |              |              |              |
|----|--------------|--------------|--------------|
| C  | 4.186406000  | 0.755707000  | -1.051321000 |
| H  | 2.339532000  | 1.986816000  | -0.986469000 |
| H  | 2.954912000  | 1.471335000  | 0.603462000  |
| C  | 4.285210000  | -0.707654000 | -0.591519000 |
| H  | 2.558891000  | -1.910973000 | 0.084411000  |
| H  | 2.603545000  | -1.624223000 | -1.666699000 |
| H  | 5.017066000  | 1.370191000  | -0.700761000 |
| H  | 4.151017000  | 0.818450000  | -2.142524000 |
| H  | 4.636847000  | -0.757027000 | 0.442546000  |
| H  | 4.959022000  | -1.306178000 | -1.206618000 |
| N  | -1.992422000 | 0.180551000  | -0.515011000 |
| O  | -0.075060000 | -1.774822000 | -0.745957000 |
| O  | -0.053146000 | 1.815450000  | -0.726843000 |
| C  | -1.083419000 | -2.587982000 | -0.979897000 |
| C  | -0.827312000 | -3.960221000 | -1.187071000 |
| C  | -2.433996000 | -2.137217000 | -1.078591000 |
| C  | -1.854450000 | -4.842211000 | -1.470064000 |
| H  | 0.198774000  | -4.299752000 | -1.114241000 |
| C  | -3.457378000 | -3.060743000 | -1.388641000 |
| C  | -3.183793000 | -4.400254000 | -1.574362000 |
| H  | -1.626169000 | -5.892591000 | -1.616597000 |
| H  | -4.476779000 | -2.696704000 | -1.468686000 |
| H  | -3.979220000 | -5.099565000 | -1.799434000 |
| C  | -2.787023000 | -0.753507000 | -0.925679000 |
| H  | -3.808828000 | -0.481965000 | -1.196579000 |
| C  | -1.192519000 | 2.455162000  | -0.836494000 |
| C  | -2.432250000 | 1.576574000  | -0.488780000 |
| H  | -3.203007000 | 1.767801000  | -1.239732000 |
| O  | -1.332160000 | 3.614575000  | -1.151949000 |
| C  | -2.936795000 | 2.010981000  | 0.885810000  |
| H  | -3.104235000 | 3.084307000  | 0.894526000  |
| H  | -2.255780000 | 1.714315000  | 1.680187000  |
| Br | -4.684104000 | 1.196431000  | 1.353408000  |

#### Table S4

Total energy in [H] and cartesian coordinates of the optimized geometry (DFT/ B3LYP) for [VO(sal-BrAla)THF], **4** (dihedral angle Br-C13/C12-N = -2°) in [Å] (xmol xyz format).

Basis set: Basis set: 6-311++g(d,p) for all atoms.

Energy = -4492.59856912

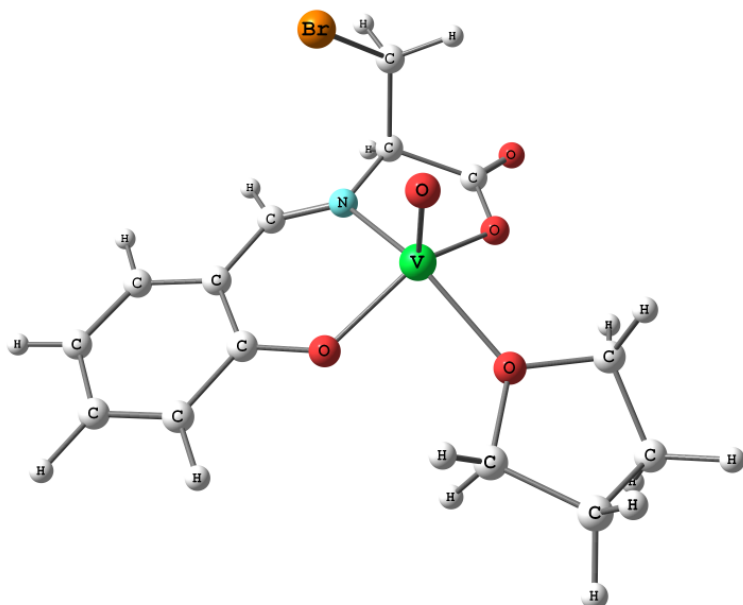

|   |             |             |             |
|---|-------------|-------------|-------------|
| V | 0.00000000  | 0.00000000  | 0.00000000  |
| O | 0.00000000  | 0.00000000  | 1.58224300  |
| O | 2.01758500  | 0.00000000  | -0.52863200 |
| C | 2.86052600  | 1.19729400  | -0.45114600 |
| C | 2.84310600  | -1.20109400 | -0.69048800 |
| C | 4.18640600  | 0.75570700  | -1.05132100 |
| H | 2.33953200  | 1.98681600  | -0.98646900 |
| H | 2.95491200  | 1.47133500  | 0.60346200  |
| C | 4.28521000  | -0.70765400 | -0.59151900 |
| H | 2.55889100  | -1.91097300 | 0.08441100  |
| H | 2.60354500  | -1.62422300 | -1.66669900 |
| H | 5.01706600  | 1.37019100  | -0.70076100 |
| H | 4.15101700  | 0.81845000  | -2.14252400 |
| H | 4.63684700  | -0.75702700 | 0.44254600  |
| H | 4.95902200  | -1.30617800 | -1.20661800 |
| N | -1.99242200 | 0.18055100  | -0.51501100 |
| O | -0.07506000 | -1.77482200 | -0.74595700 |
| O | -0.05314600 | 1.81545000  | -0.72684300 |
| C | -1.08341900 | -2.58798200 | -0.97989700 |
| C | -0.82731200 | -3.96022100 | -1.18707100 |
| C | -2.43399600 | -2.13721700 | -1.07859100 |
| C | -1.85445000 | -4.84221100 | -1.47006400 |
| H | 0.19877400  | -4.29975200 | -1.11424100 |
| C | -3.45737800 | -3.06074300 | -1.38864100 |
| C | -3.18379300 | -4.40025400 | -1.57436200 |
| H | -1.62616900 | -5.89259100 | -1.61659700 |
| H | -4.47677900 | -2.69670400 | -1.46868600 |
| H | -3.97922000 | -5.09956500 | -1.79943400 |
| C | -2.78702300 | -0.75350700 | -0.92567900 |
| H | -3.80882800 | -0.48196500 | -1.19657900 |
| C | -1.19251900 | 2.45516200  | -0.83649400 |
| C | -2.43225000 | 1.57657400  | -0.48878000 |
| H | -3.20300700 | 1.76780100  | -1.23973200 |
| O | -1.33216000 | 3.61457500  | -1.15194900 |

|    |              |             |             |
|----|--------------|-------------|-------------|
| C  | -2.936795000 | 2.010981000 | 0.885810000 |
| H  | -3.976215000 | 2.319065000 | 0.816301000 |
| H  | -2.322068000 | 2.800082000 | 1.312724000 |
| Br | -2.906534000 | 0.537820000 | 2.214007000 |

### Table S5

Total energy in [H] and cartesian coordinates of the optimized geometry (DFT/B3LYP) for **Boc-BrAlaMe** in [Å] (xmol xyz format).  
Basis set: 6-311++g(3d,3p) for all atoms.  
Energy = -3282.67461860

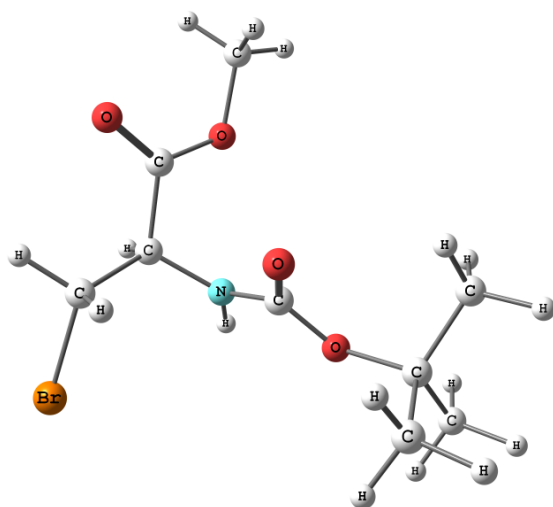

|   |              |              |              |
|---|--------------|--------------|--------------|
| C | 0.030148000  | -0.139456000 | 0.168149000  |
| C | -0.011018000 | 0.269916000  | 1.653753000  |
| O | 1.193354000  | 0.636435000  | 2.101638000  |
| O | -1.026498000 | 0.331335000  | 2.297292000  |
| C | 1.244504000  | 1.050699000  | 3.480166000  |
| N | 1.228698000  | -0.868075000 | -0.182912000 |
| C | 1.575121000  | -2.020401000 | 0.464157000  |
| O | 2.644897000  | -2.576722000 | -0.132884000 |
| O | 0.986435000  | -2.438551000 | 1.441181000  |
| C | 3.236895000  | -3.835291000 | 0.364004000  |
| C | 4.387186000  | -4.066925000 | -0.614434000 |
| C | 2.212658000  | -4.967129000 | 0.274026000  |
| C | 3.764795000  | -3.638520000 | 1.785534000  |
| H | 2.280977000  | 1.313940000  | 3.664255000  |
| H | 0.934968000  | 0.232382000  | 4.126589000  |
| H | 0.593779000  | 1.907155000  | 3.643751000  |
| H | 1.686220000  | -0.662541000 | -1.053497000 |
| H | 4.917746000  | -4.982559000 | -0.353370000 |
| H | 5.092914000  | -3.237058000 | -0.582357000 |
| H | 4.012426000  | -4.162905000 | -1.633247000 |
| H | 2.698305000  | -5.912630000 | 0.519113000  |
| H | 1.818166000  | -5.042309000 | -0.739800000 |

|    |              |              |              |
|----|--------------|--------------|--------------|
| H  | 1.388214000  | -4.810551000 | 0.963930000  |
| H  | 4.310381000  | -4.531340000 | 2.094023000  |
| H  | 2.953603000  | -3.466291000 | 2.487350000  |
| H  | 4.451719000  | -2.792323000 | 1.821344000  |
| C  | -1.270868000 | -0.859792000 | -0.186366000 |
| H  | -1.297567000 | -1.859602000 | 0.229091000  |
| H  | -2.135190000 | -0.293580000 | 0.134136000  |
| H  | 0.067754000  | 0.801607000  | -0.384686000 |
| Br | -1.447250000 | -1.066900000 | -2.146492000 |

**Table S6**

Total energy in [H] and cartesian coordinates of the optimized geometry (DFT/B3LYP) for **BrAlaMe** in [Å] (xmol xyz format).

Basis set: 6-311++g(3d,3p) for all atoms.

Energy = -2936.7246676

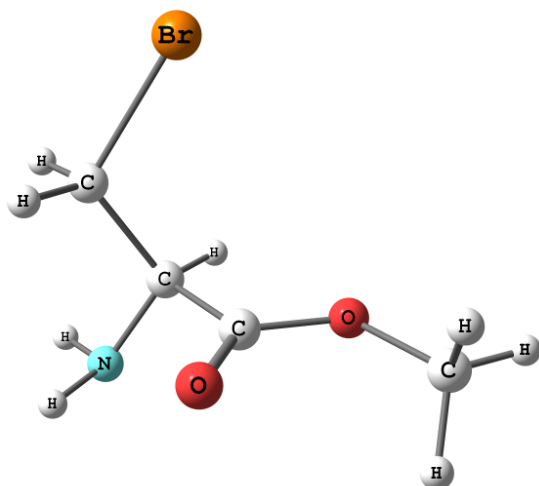

|    |              |              |              |
|----|--------------|--------------|--------------|
| C  | 0.013736000  | 0.090263000  | 0.013451000  |
| C  | 0.024413000  | 0.172638000  | 1.538976000  |
| O  | 1.236918000  | -0.044895000 | 2.054385000  |
| O  | -0.967370000 | 0.393385000  | 2.188833000  |
| C  | 1.329162000  | 0.013046000  | 3.491753000  |
| C  | -0.448420000 | 1.418771000  | -0.588370000 |
| N  | -0.887873000 | -1.008980000 | -0.337890000 |
| Br | 0.830135000  | 2.901423000  | -0.257245000 |
| H  | 1.014700000  | -0.150278000 | -0.338386000 |
| H  | 2.371327000  | -0.181078000 | 3.722294000  |
| H  | 0.687287000  | -0.742023000 | 3.940273000  |
| H  | 1.032717000  | 0.997695000  | 3.846407000  |
| H  | -1.391078000 | 1.739771000  | -0.156875000 |
| H  | -0.526196000 | 1.345966000  | -1.668255000 |
| H  | -0.967825000 | -1.109965000 | -1.342263000 |
| H  | -1.812805000 | -0.842259000 | 0.043000000  |
